# Supplementary material for: Whole-Genome Sequencing for Routine Pathogen Surveillance in Public Health: a Population Snapshot of Invasive Staphylococcus aureus in Europe
Source: PubMed Central journal article supplement (PMC4959656; doi:10.1128/mbio.00444-16), 2016-05-05

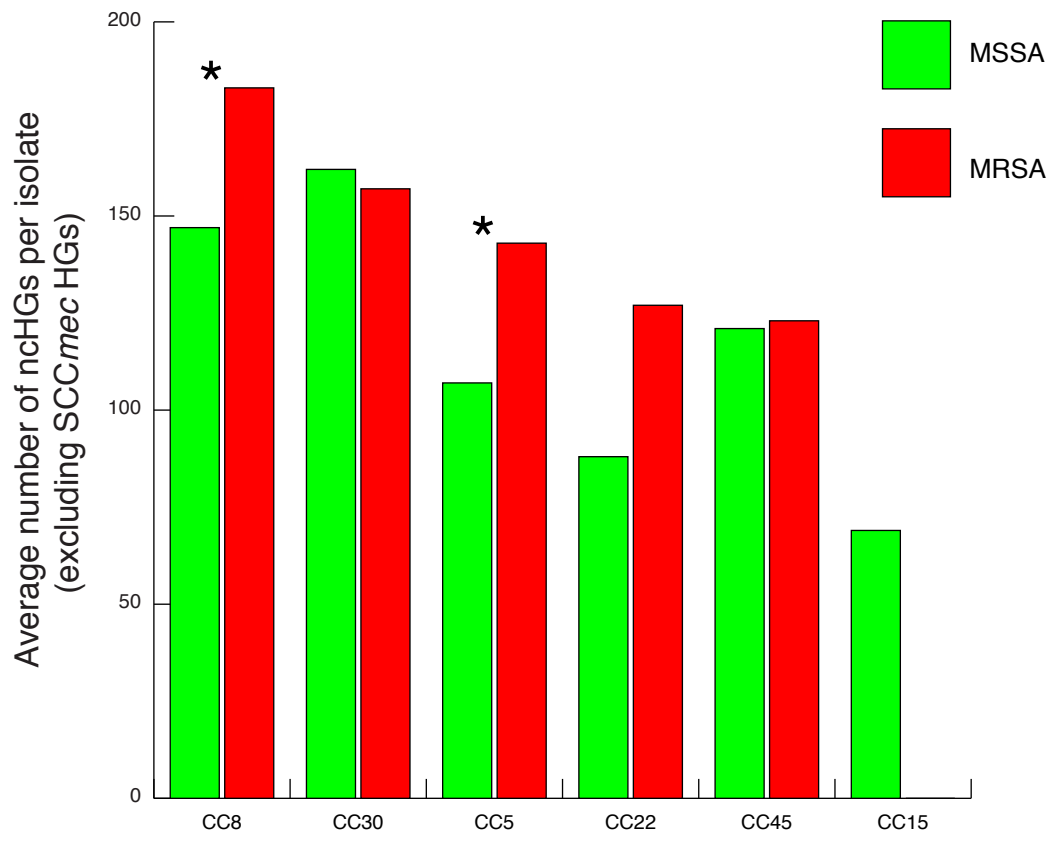

Supplement: mbo002162813sf6.pdf [file mbo002162813sf6.pdf]
